# Supplementary material
Source: PubMed Central journal article supplement (PMC5031537)

# Supp Figure S2

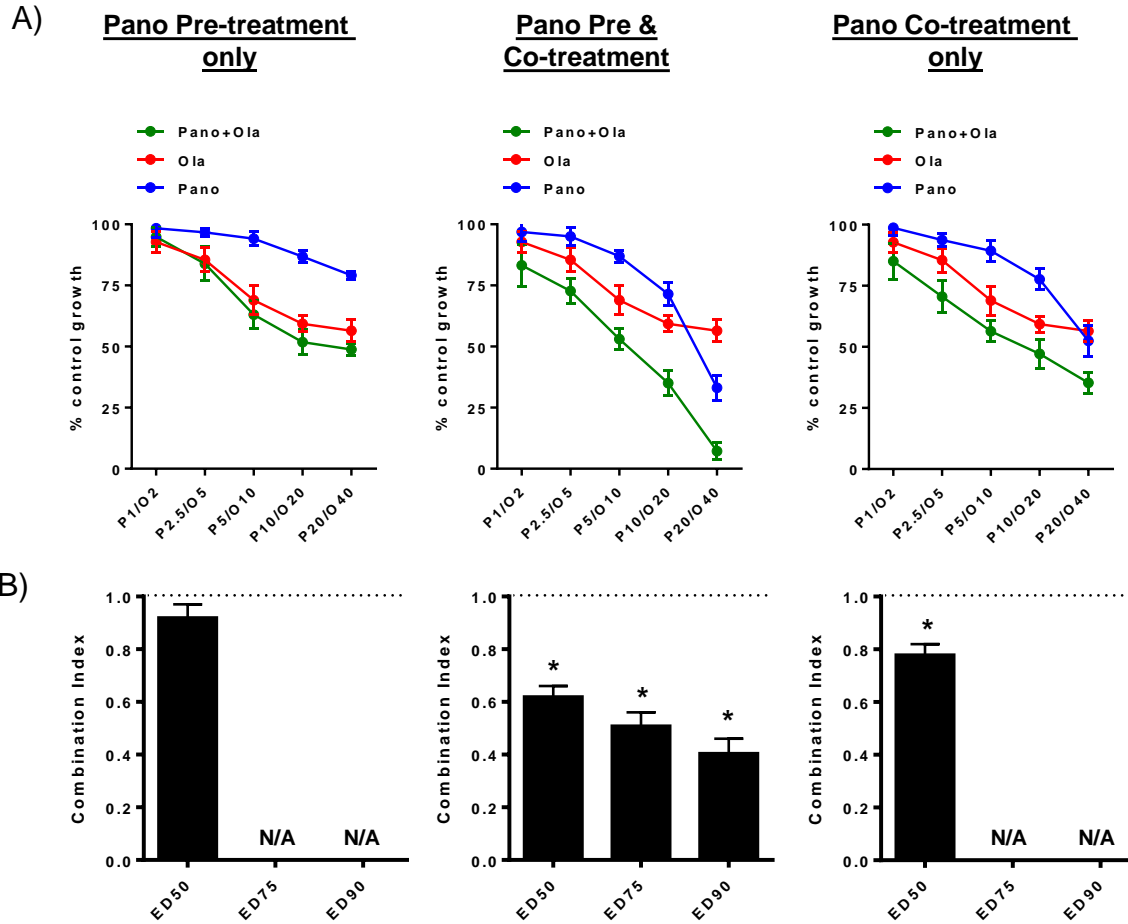

# Supp Figure S3

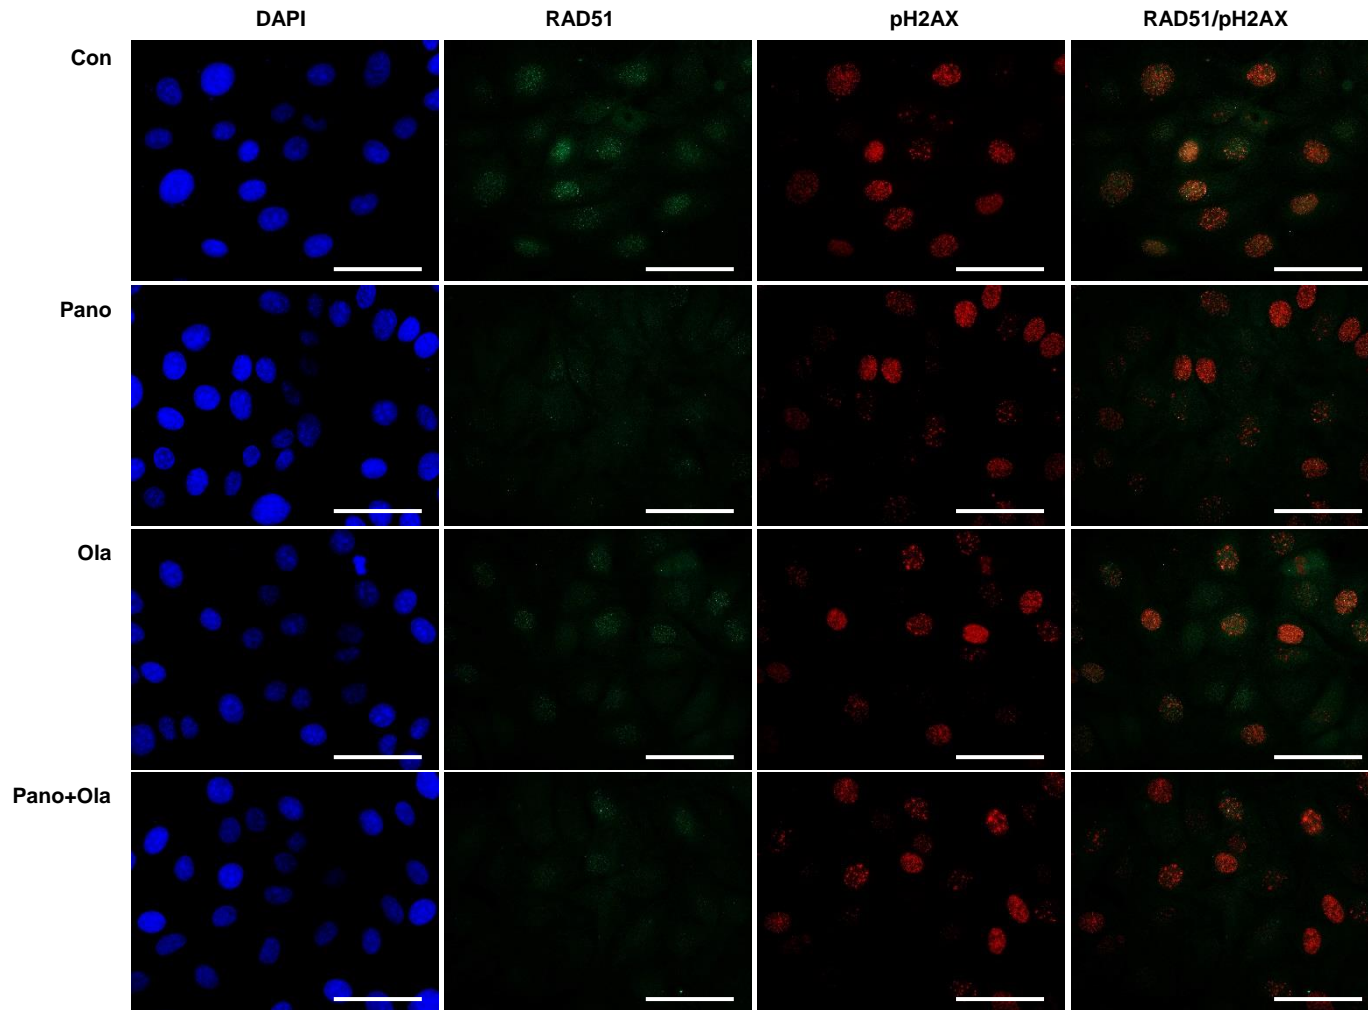

## Supp Figure S4

A)

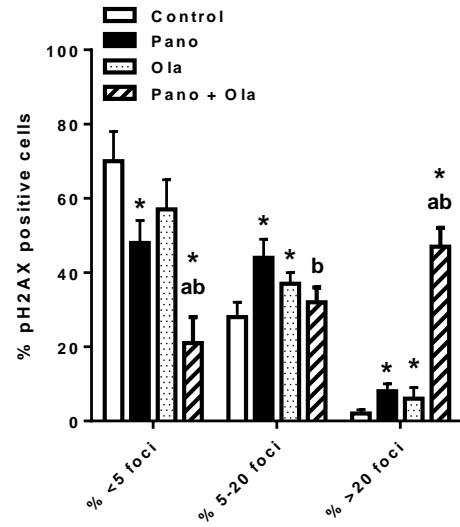

B)

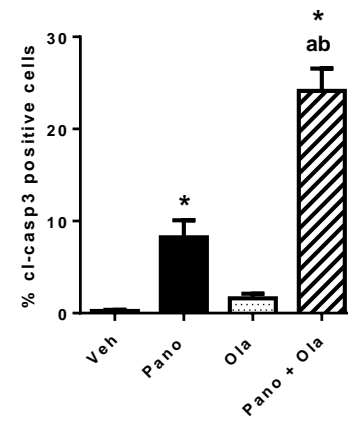

# Supp Figure S5

A)

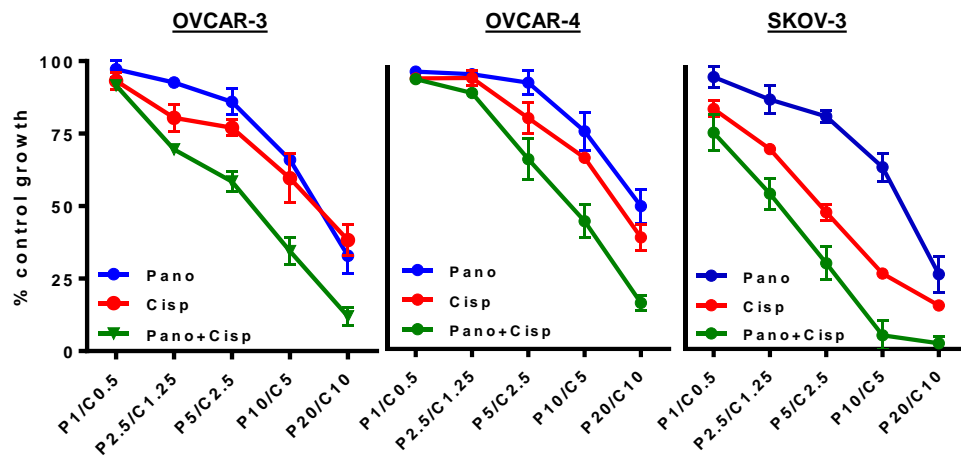

B)

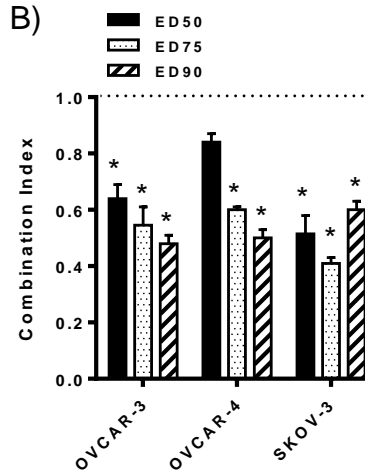

C)

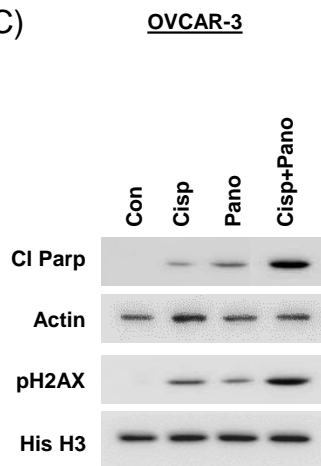

D)

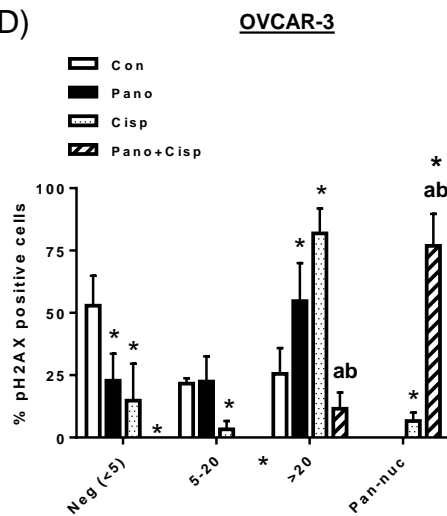

E)

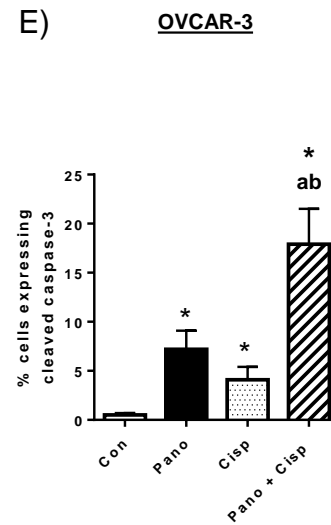

# Supp Figure S6

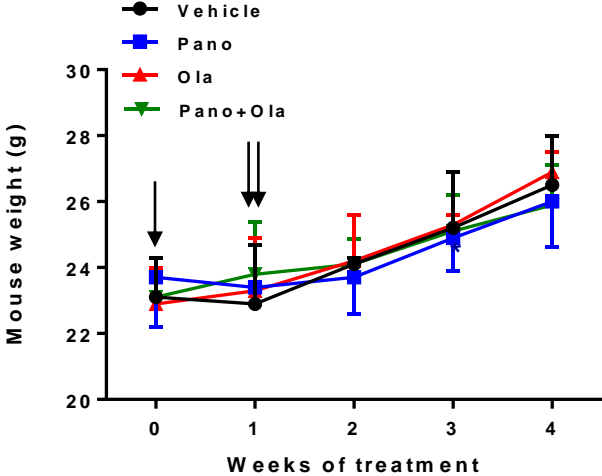

Supplement: NIHMS804631-supplement-2.pdf [file NIHMS804631-supplement-2.pdf]
